# Supplementary material
Source: PubMed Central journal article supplement (PMC4520771)
Supplement: NIHMS705991-supplement.pdf [file NIHMS705991-supplement.pdf]

## Supplementary data

### Structure of EspB, a secreted substrate of the ESX-1 secretion system of *Mycobacterium tuberculosis*

Natalia Korotkova<sup>1†</sup>, Jérémie Piton<sup>2†</sup>, Jonathan M. Wagner<sup>1§</sup>, Stefanie Boy-Röttger<sup>2</sup>, Aleksandre Japaridze<sup>3</sup>, Timothy J. Evans<sup>1#</sup>, Stewart T. Cole<sup>2</sup>, Florence Pojer<sup>2\*</sup>, Konstantin V. Korotkov<sup>1\*</sup>

<sup>1</sup>Department of Molecular & Cellular Biochemistry, and Center for Structural Biology, University of Kentucky, Lexington, Kentucky, 40536, United States of America

<sup>2</sup> Global Health Institute, Ecole Polytechnique Fédérale de Lausanne, CH-1015 Lausanne, Switzerland

<sup>3</sup>Laboratory of Physics of Living Matter, Ecole Polytechnique Fédérale de Lausanne, CH-1015 Lausanne, Switzerland

†Contributed equally.

§Current address: Department of Molecular Physiology and Biological Physics and The Myles H. Thaler Center for AIDS and Human Retrovirus Research, University of Virginia, Charlottesville, Virginia, United States of America

#Current address: Division of Regulatory Services, College of Agriculture, Food and Environment, University of Kentucky, Lexington, Kentucky, United States of America

\*Correspondence to: Florence Pojer, Ecole Polytechnique Fédérale de Lausanne, Global Health Institute, CH-1015 Lausanne, Switzerland, Phone: +41 21 69 31772, Fax: +41 21 69 31790, E-mail: [florence.pojer@epfl.ch](mailto:florence.pojer@epfl.ch), and Konstantin V. Korotkov, Department of Molecular & Cellular Biochemistry, University of Kentucky, 741 South Limestone, Lexington, KY 40536, USA, Phone: 859-323-5493, Fax: 859-257-2283, E-mail: [kkorotkov@uky.edu](mailto:kkorotkov@uky.edu)

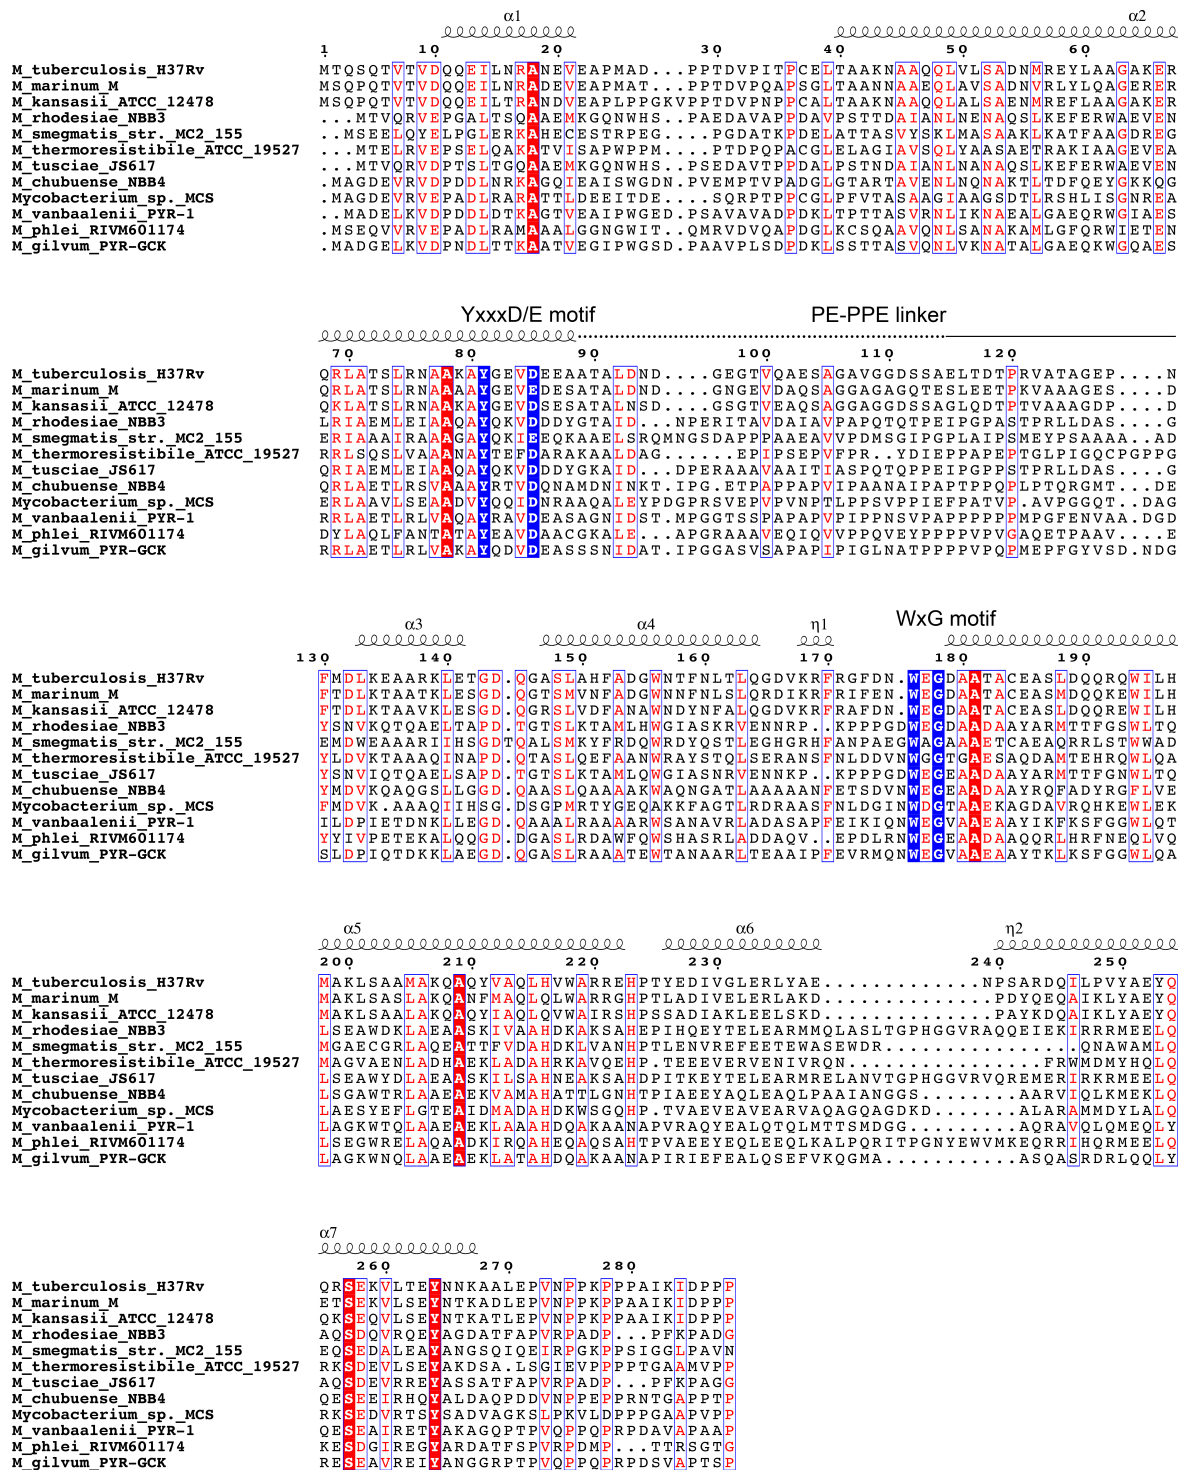

**Fig. S1.** Sequence alignment of PE-PPE domains of EspB proteins from the ESX-1 clusters of mycobacteria. Sequences with >98% sequence identity were excluded from the alignment. The secondary structure elements according to the structure of EspB<sub>7-278</sub> (PDB: 4XXX) are shown above the alignment. The disordered region of PE-PPE linker is indicated by a dashed line. The YxxxD/E type VII (ESX) secretion motif in PE domain and the WxG motif in PPE domain are highlighted in blue.

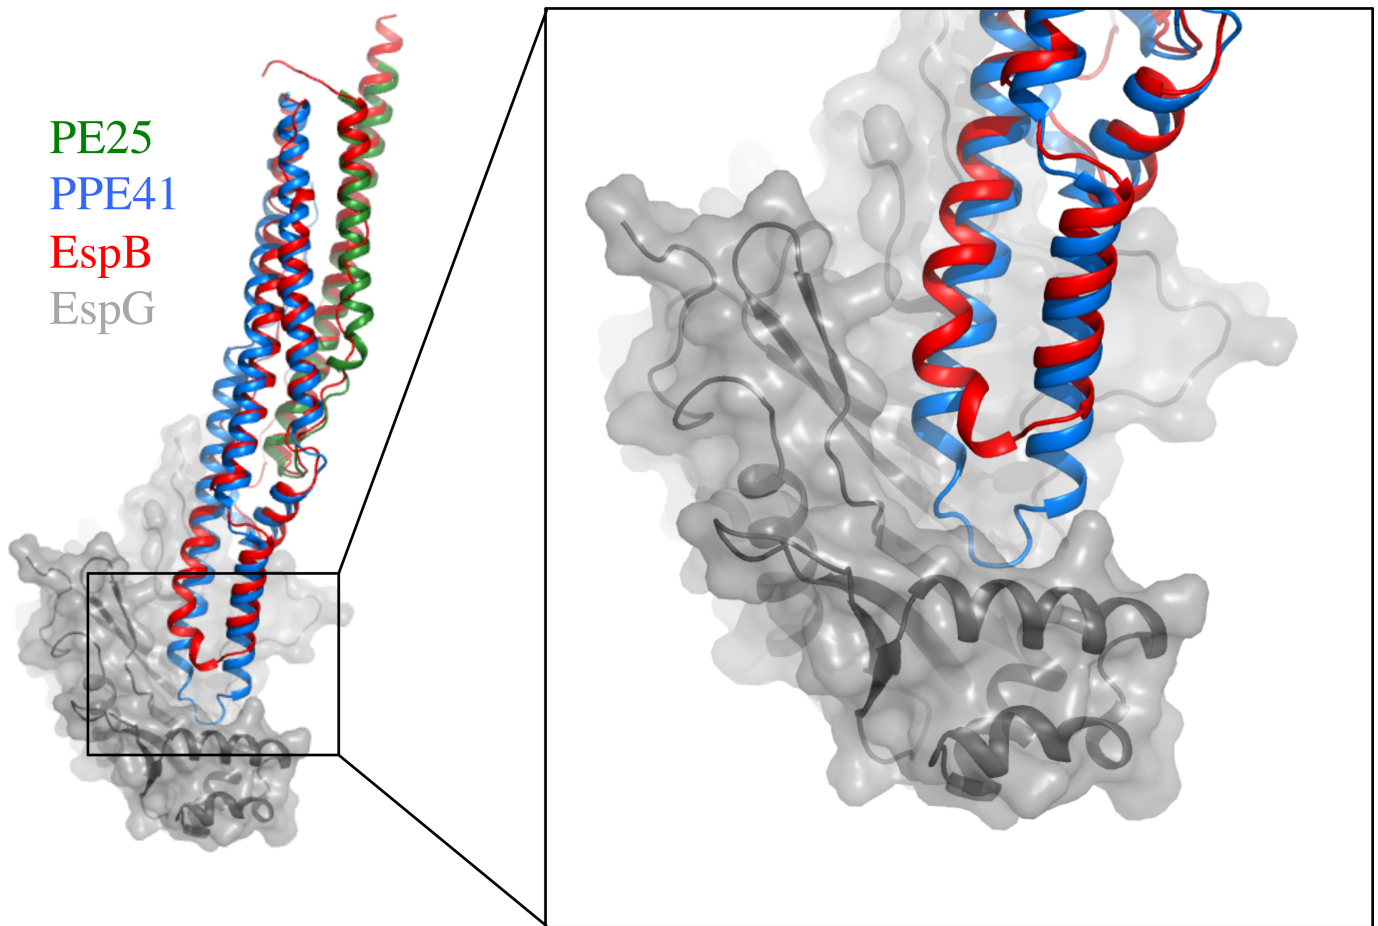

**Fig. S2.** Superimposition between the structure of the PE25–PPE41–EspG<sub>5</sub> complex and EspB.
